# Supplementary material for: Osmotic Dehydration, Drying Kinetics, and Quality Attributes of Osmotic Hot Air-Dried Mango as Affected by Initial Frozen Storage
Source: MDPI journal article supplement (doi:10.3390/foods11030489), 2022-02-08
Supplement: s1 [file s1]

## **Supplementary information**

### **Osmotic dehydration, drying kinetics, and quality attributes of osmotic hot air-dried mango as affected by initial frozen storage**

Pramote Khuwijitjaru<sup>1</sup>, Supawadee Somkane<sup>1</sup>, Kyuya Nakagawa<sup>2</sup>, Busarakorn Mahayothee<sup>1\*</sup>

<sup>1</sup>Department of Food Technology, Faculty of Engineering and Industrial Technology, Silpakorn University, Nakhon Pathom 73000, Thailand

<sup>2</sup>Department of Chemical Engineering, Faculty of Engineering, Kyoto University, Katsura, Nishikyo-ku, Kyoto 615-8510, Japan

\*Correspondence. E-mail: mahayothee\_b@su.ac.th (B. Mahayothee)

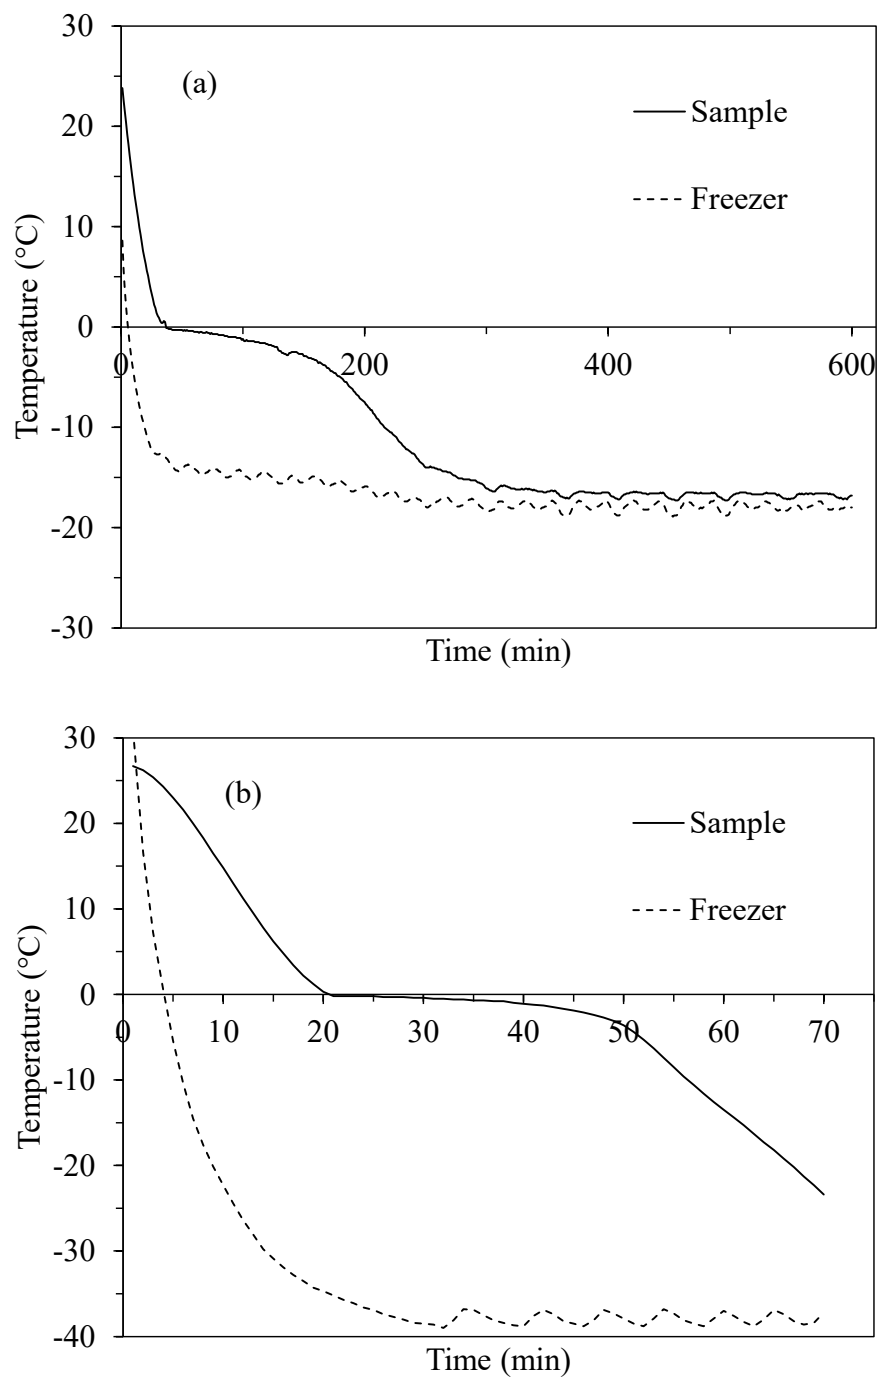

**Figure S1.** Freezing curves of mango slabs in (a) conventional freezer and (b) air-blast freezer.

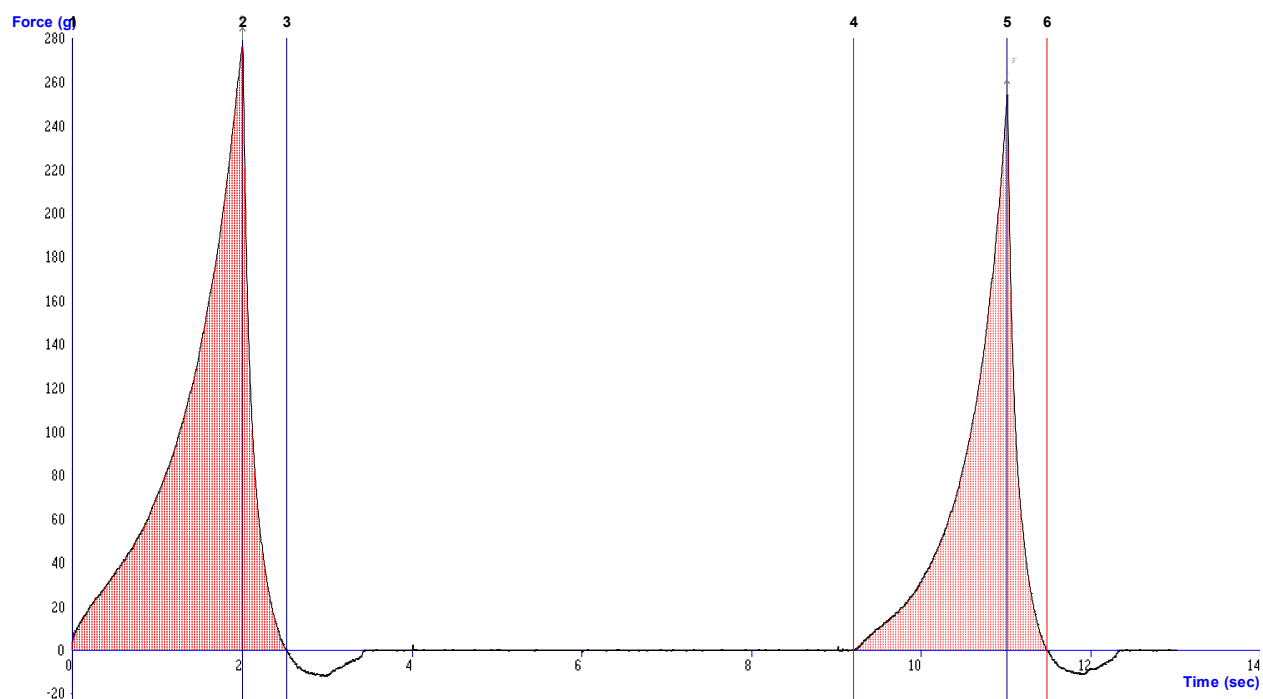

**Figure S2.** Figure S2. Texture Analyzer graph using p/2 probe.

**Table S1.** Quality indices of fresh mangoes used in this study.

| Quality indices              | Range       |             |
|------------------------------|-------------|-------------|
| Moisture content (% w.b.)    | 78.89–82.56 |             |
| Total soluble solids (°Brix) | 18.7–19.2   |             |
| Titrateable acidity (%)      | 0.74–1.08   |             |
| pH                           | 3.63–4.28   |             |
| Hardness (g)                 | 27.53–58.12 |             |
| Flesh color                  | Peel side   | Inner side  |
| L*                           | 43.75–61.32 | 41.57–57.28 |
| a*                           | 11.27–18.09 | 10.63–18.31 |
| b*                           | 38.18–64.22 | 34.46–61.07 |
| C*                           | 39.88–66.76 | 36.07–62.80 |
| h°                           | 41.57–57.59 | 70.70–77.68 |
